# Supplementary material for: Impact of Social Exclusion on salivary Progesterone and Estradiol in Women with Borderline Personality Disorder
Source: Research Square preprint supplement (doi:10.21203/rs.3.rs-5566176/v1), 2024-12-26
Supplement: Supplementary file 1 [file 45f49eb6e62e3c01d51185aa.docx]

**Supplementary Material**

**Results**

**Demographics**

Of the BPD group, 22 individuals took one substance, 15 took two substances, and three took three different substances. Patients reported taking the following substances: serotonin and noradrenaline reuptake inhibitors (SNRI) *n* = 14, selective serotonin reuptake inhibitors (SSRI) *n* = 15, anti-psychotics *n* = 12, dopamine and noradrenergic reuptake inhibitors (NDRI) *n* = 3, tricyclic antidepressants *n* = 3, noradrenergic and specific serotonergic antidepressants (NaSSa) *n*= 2, anticonvulsants *n* = 2, methylphenidate *n* = 2.

In the BPD group, the following comorbid diagnoses were determined: eating disorder *n* = 18, PTSD *n* = 20, alcohol abuse *n* = 5, drug abuse *n* = 5, agoraphobia with panic disorder *n* = 4, social phobia *n* = 3, ADHD *n* = 3, panic disorder *n*= 2, obsessive-compulsive disorder *n* = 2, agoraphobia *n* = 1.
